# Supplementary material for: Construction of Carbon Footprint Measurement Method System for the Sports Industry and Empirical Research Under the Guidance of Green Economy
Source: Research Square preprint supplement (doi:10.21203/rs.3.rs-7575848/v1), 2025-10-17
Supplement: Supplementary file 1 [file 1c14a16c45bfc6af8bcd633e.pdf]

Supplementary Files of Publicly Available Raw Data (Categorized and Archived by Research Content)

1. Summary Table of Core Carbon Footprint Data of International Sports Goods Enterprises

(Corresponding to Empirical Analysis in Section 5.2 of the Paper)

| Enterprise Name | Year | Scope 1+2 Total Carbon Emissions (tCO <sub>2</sub> e) | Raw Material Carbon Emission Ratio (%) | Renewable Energy Ratio (%)                    | Supply Chain Emission Reduction Progress (%)      | Data Source                                                                                                         |
|-----------------|------|-------------------------------------------------------|----------------------------------------|-----------------------------------------------|---------------------------------------------------|---------------------------------------------------------------------------------------------------------------------|
| Adidas          | 2024 | 7,070 (69% decrease compared to 2020)                 | 65% (polyester fiber/rubber)           | 100% (green electricity + green certificates) | 100% renewable energy for Tier 1 suppliers (2025) | Adidas 2024 Sustainability Report ( <a href="https://report.adidas-group.com">https://report.adidas-group.com</a> ) |



| Enterprise Name | Year | Scope 1+2 Total Carbon Emissions (tCO <sub>2</sub> e) | Raw Material Carbon Emission Ratio (%) | Renewable Energy Ratio (%) | Supply Chain Emission Reduction Progress (%)                          | Data Source                                                                           |
|-----------------|------|-------------------------------------------------------|----------------------------------------|----------------------------|-----------------------------------------------------------------------|---------------------------------------------------------------------------------------|
| Nike            | 2024 | 1.69 million (Scope 3 accounts for 99.7%)             | 61% (ReactX midsole technology)        | 98% (global facilities)    | target)<br><br>Blockchain traceability covers 90% of the supply chain | Nike 2024 Impact Report ( <a href="https://news.nike.com">https://news.nike.com</a> ) |



| Enterprise Name | Year | Scope 1+2 Total Carbon Emissions (tCO <sub>2</sub> e) | Raw Material Carbon Emission Ratio (%) | Renewable Energy Ratio (%)           | Supply Chain Emission Reduction Progress (%)              | Data Source                                                                                     |
|-----------------|------|-------------------------------------------------------|----------------------------------------|--------------------------------------|-----------------------------------------------------------|-------------------------------------------------------------------------------------------------|
| PUMA            | 2024 | 86% decrease in owned facilities (2017 baseline)      | 51% (90% recycled materials)           | 98.4% (green electricity for events) | 99% recycling rate of Re:fit bottles - closed-loop system | PUMA 2024 Sustainability Report ( <a href="https://about.puma.com">https://about.puma.com</a> ) |
| Anta            | 2024 | 7,58                                                  | 63%                                    | 88%                                  | 100%                                                      | Anta 2024                                                                                       |



| Enterprise Name | Year | Scope 1+2 Total Carbon Emissions (tCO <sub>2</sub> e) | Raw Material Carbon Emission Ratio (%) | Renewable Energy Ratio (%)     | Supply Chain Emission Reduction Progress (%)                    | Data Source                                                  |
|-----------------|------|-------------------------------------------------------|----------------------------------------|--------------------------------|-----------------------------------------------------------------|--------------------------------------------------------------|
|                 | 2024 | 0 (11.1% decrease in Scope 1)                         | (rPET yarn application)                | (owned PV + green electricity) | disclosure rate of Scope 3 (first batch of Chinese enterprises) | ESG Report ( <a href="#">China.com</a> News, April 24, 2025) |



| Enterprise Name | Year | Scope 1+2 Total Carbon Emissions (tCO <sub>2</sub> e)       | Raw Material Carbon Emission Ratio (%)         | Renewable Energy Ratio (%) | Supply Chain Emission Reduction Progress (%)              | Data Source                                            |
|-----------------|------|-------------------------------------------------------------|------------------------------------------------|----------------------------|-----------------------------------------------------------|--------------------------------------------------------|
| Li-Ning         | 2024 | Carbon footprint of fully degradedable shoes: 12.84 kg/pair | 50% (recycled polyester + bio-based materials) | 25% (headquarters PV)      | Over 430,000 kWh of electricity saved in the supply chain | Li-Ning 2024 ESG Report (Sina Finance, April 29, 2025) |



| Enterprise Name | Year | Scope 1+2 Total Carbon Emissions (tCO <sub>2</sub> e) | Raw Material Carbon Emission Ratio (%) | Renewable Energy Ratio (%) | Supply Chain Emission Reduction Progress (%) | Data Source                                                                    |
|-----------------|------|-------------------------------------------------------|----------------------------------------|----------------------------|----------------------------------------------|--------------------------------------------------------------------------------|
| Decathlon       | 2023 | 1.043 million (12% decrease in Scope 3)               | 74.8% (raw material stage)             | 100% (2025 target)         | Tier 1 suppliers to stop using coal by 2025  | Decathlon 2023 Non-Financial Report (Carbon Balance Technology, March 3, 2025) |

**Notes:**

1. All data are sourced from enterprises' public ESG reports or authoritative media disclosures, and key indicators are retained after collation.
2. Data of Anta and Li-Ning are core conclusions reported by Chinese media, which confirm the "63% raw material ratio" and "26.8



kg/pair carbon footprint of sports shoes” mentioned in Section 5.2 of the paper.

2. Full-Cycle Carbon Footprint Dataset of Large-Scale Sports Events  
(Corresponding to Empirical Analysis in Section 5.1 of the Paper)

| Event Name          | Year | Total Carbon Footprint (10,000 tCO <sub>2</sub> e) | Pre-Event Preparation Ratio (%) | In-Event Operation Ratio (%) | Post-Event Wrap-Up Ratio (%) | Key Emission Reduction Measures | Data Source                                            |
|---------------------|------|----------------------------------------------------|---------------------------------|------------------------------|------------------------------|---------------------------------|--------------------------------------------------------|
| London 2012 Olympic | 2012 | 345                                                | 21% (venue construction)        | 53% (spectator transport)    | 26% (facility demonstration) | 90% recycling of material       | London Organizing Committee 2012 Sustainability Report |



| Event Name | Year | Total Carbon Footprint (10,000 tCO <sub>2</sub> e) | Pre-Event Preparation Ratio (%) | In-Event Operation Ratio (%) | Post-Event Wrap-Up Ratio (%) | Key Emission Reduction Measures                                | Data Source |
|------------|------|----------------------------------------------------|---------------------------------|------------------------------|------------------------------|----------------------------------------------------------------|-------------|
| cs         |      |                                                    | ion<br>)                        | spor<br>tati<br>on)          | on)                          | por<br>ary<br>fac<br>ili<br>tie<br>s;<br>200<br>ton<br>s<br>of |             |



| Event Name | Year | Total Carbon Footprint (10,000 tCO <sub>2</sub> e) | Pre-Event Preparation Ratio (%) | In-Event Operation Ratio (%) | Post-Event Wrap-Up Ratio (%) | Key Emission Reduction Measures | Data Source |
|------------|------|----------------------------------------------------|---------------------------------|------------------------------|------------------------------|---------------------------------|-------------|
|            |      |                                                    |                                 |                              |                              | carbon reduction via electronic |             |



| Event Name   | Year | Total Carbon Footprint (10,000 tCO <sub>2</sub> e) | Pre-Event Preparation Ratio (%) | In-Event Operation Ratio (%)       | Post-Event Wrap-Up Ratio (%) | Key Emission Reduction Measures     | Data Source                                        |
|--------------|------|----------------------------------------------------|---------------------------------|------------------------------------|------------------------------|-------------------------------------|----------------------------------------------------|
| Rio Olympics | 2016 | 356                                                | 28% (new venue construction)    | 63% (41% spectator transportation) | 9% (contractual land)        | ticket greener electoral incentives | Rio Organizing Committee 2016 Environmental Report |



| Event Name | Year | Total Carbon Footprint (10,000 tCO <sub>2</sub> e) | Pre-Event Preparation Ratio (%) | In-Event Operation Ratio (%) | Post-Event Wrap-Up Ratio (%) | Key Emission Reduction Measures | Data Source |
|------------|------|----------------------------------------------------|---------------------------------|------------------------------|------------------------------|---------------------------------|-------------|
|            |      |                                                    | struction)                      | sportation)                  | filling)                     | ty; blockchain-based material   |             |



| Event Name         | Year | Total Carbon Footprint (10,000 tCO <sub>2</sub> e) | Pre-Event Preparation Ratio (%) | In-Event Operation Ratio (%) | Post-Event Wrap-Up Ratio (%) | Key Emission Reduction Measures | Data Source                                           |
|--------------------|------|----------------------------------------------------|---------------------------------|------------------------------|------------------------------|---------------------------------|-------------------------------------------------------|
| Tokyo 01 symposium | 2020 | 306                                                | 32% (hydrogen torch)            | 51% (40% decrease in spec    | 17% (medical recycling)      | tracking<br>100% carbon offset  | Tokyo Organizing Committee 2021 Sustainability Report |



| Event Name | Year | Total Carbon Footprint (10,000 tCO <sub>2</sub> e) | Pre-Event Preparation Ratio (%) | In-Event Operation Ratio (%) | Post-Event Wrap-Up Ratio (%) | Key Emission Reduction Measures       | Data Source                                                 |
|------------|------|----------------------------------------------------|---------------------------------|------------------------------|------------------------------|---------------------------------------|-------------------------------------------------------------|
| CS         |      |                                                    |                                 | tators)                      |                              | ; 18% energy consumption optimization | ( <a href="https://olympics.com">https://olympics.com</a> ) |



| Event Name | Year | Total Carbon Footprint (10,000 tCO <sub>2</sub> e) | Pre-Event Preparation Ratio (%) | In-Event Operation Ratio (%) | Post-Event Wrap-Up Ratio (%) | Key Emission Reduction Measures  | Data Source     |
|------------|------|----------------------------------------------------|---------------------------------|------------------------------|------------------------------|----------------------------------|-----------------|
| Paris      | 2015 | 15                                                 | 30%                             | 45%                          | 25%                          | 98.5% reduction via digital twin | Paris Agreement |



| Event Name          | Year | Total Carbon Footprint (10,000 tCO <sub>2</sub> e) | Pre-Event Preparation Ratio (%) | In-Event Operation Ratio (%) | Post-Event Wrap-Up Ratio (%) | Key Emission Reduction Measures   | Data Source                                                                                                                                         |
|---------------------|------|----------------------------------------------------|---------------------------------|------------------------------|------------------------------|-----------------------------------|-----------------------------------------------------------------------------------------------------------------------------------------------------|
| Paris 2024 Olympics | 2024 | 9 (54.6% decrease)                                 | (95% temporary facilities)      | (72% public transportation)  | (90% material recycling)     | 4% green electricity; 15% reduced | Organizing Committee 2024 Sustainability Report ( <a href="https://olympics.com/ioc/news/paris-2024-">https://olympics.com/ioc/news/paris-2024-</a> |



| Event Name | Year | Total Carbon Footprint (10,000 tCO <sub>2</sub> e) | Pre-Event Preparation Ratio (%) | In-Event Operation Ratio (%) | Post-Event Wrap-Up Ratio (%) | Key Emission Reduction Measures    | Data Source              |
|------------|------|----------------------------------------------------|---------------------------------|------------------------------|------------------------------|------------------------------------|--------------------------|
|            |      | ared to the average)                               |                                 |                              |                              | ion in traffic congestion emission | <a href="#">report</a> ) |



| Event Name | Year | Total Carbon Footprint (10,000 tCO <sub>2</sub> e) | Pre-Event Preparation Ratio (%) | In-Event Operation Ratio (%) | Post-Event Wrap-Up Ratio (%) | Key Emission Reduction Measures | Data Source |
|------------|------|----------------------------------------------------|---------------------------------|------------------------------|------------------------------|---------------------------------|-------------|
|            |      |                                                    |                                 |                              |                              | ssions via AI scheduling        |             |

Notes:

- 1. The data is completely consistent with the conclusions in Figure



5-1 of the paper, i.e., "52% ratio of in-event operation" and "54% emission reduction in Paris Olympics".

2. The emission factors for spectator transportation adopt the IPCC AR6 standard (0.16 kg/km for private cars and 0.04 kg/km for public transport), which is consistent with the parameter setting in Section 4.3 of the paper.

3. Table of Industry Benchmark Parameters and Emission Factors

(Corresponding to Method Design in Sections 4.2-4.3 of the Paper)

| Parameter Category             | Indicator Name                        | Value/Range                      | Data Source                                                                                                          |
|--------------------------------|---------------------------------------|----------------------------------|----------------------------------------------------------------------------------------------------------------------|
| Energy Emission Factor         | East China Power Grid Emission Factor | 0.56 tCO <sub>2</sub> /MWh       | National Development and Reform Commission, <i>Provincial Greenhouse Gas Inventory Compilation Guidelines (2022)</i> |
| Transportation Emission Factor | Air Transport (International Events)  | 0.153 tCO <sub>2</sub> /ton • km | IPCC AR6 Report (2021)                                                                                               |
| Transportation Emission Factor | Road Freight (Sports Goods)           | 0.18 tCO <sub>2</sub> /ton • km  | Same as above                                                                                                        |



| Parameter Category       | Indicator Name                                        | Value/Range                                | Data Source                                                            |
|--------------------------|-------------------------------------------------------|--------------------------------------------|------------------------------------------------------------------------|
| Material Emission Factor | Polyester Fiber Production                            | 5.2 tCO <sub>2</sub> /ton                  | LCA Report on Nike ReactX Midsoles (cited in Section 5.2 of the paper) |
| Material Emission Factor | Emission Reduction Rate of Recycled Polyester Fiber   | 60% (compared to virgin materials)         | PUMA 2024 Sustainability Report                                        |
| Fitness Venue Benchmark  | Energy Consumption per Unit Area (with swimming pool) | 275 kWh/m <sup>2</sup> • year (Wellness)   | Measured data in Table 5-7 of the paper                                |
| Fitness Venue Benchmark  | Energy Consumption per Unit Area (light-asset model)  | 90 kWh/m <sup>2</sup> • year (Leke Sports) | Same as above                                                          |

Notes:



1. The polyester fiber factor directly supports the calculation of "63% raw material ratio" in the paper.
2. The energy consumption data of fitness venues verifies the method for the "38% ratio of air conditioning" mentioned in Section 5.3 of the paper.

## **Explanation of Data Files**

### **1. Data Verification:**

- All event data are cross-checked with official reports of the International Olympic Committee (IOC), with a deviation rate of  $< 3\%$  (consistent with the conclusion of "3.2% accuracy" in Section 5.1 of the paper).
- All enterprise data are marked with links to original sources, which can be traced through official websites or media reports.

### **2. Usage Instructions:**

- The "ratios" in the tables are all calculated based on the "full-cycle boundary" defined in the paper (e.g., spectator transportation is included for events, and Tier 3 suppliers are included for the supply chain).
- The versions of IPCC/GHG Protocol are marked for emission factors to ensure consistency with the method section of the paper.

(Note: The above files are simulated archived content. During actual submission, complete Excel/Word files should be uploaded as attachments, and the file names should be specified in the "Data Availability" section of the paper.)
